1 **Erythritol synthesis in human cells is elevated in response to oxidative stress**  
2 **and regulated by the non-oxidative pentose phosphate pathway**

3 Semira R. Ortiz<sup>a</sup>, Alexander Heinz<sup>b</sup>, Karsten Hiller<sup>b</sup>, and Martha S. Field<sup>a</sup>

4  
5 From the <sup>a</sup>Division of Nutritional Sciences, Cornell University, Ithaca, NY 14853, USA; and  
6 <sup>b</sup>Department of Bioinformatics and Biochemistry, BRICS, Technische Universität  
7 Braunschweig, 38106 Braunschweig, Germany.

8  
9 **Corresponding author:** Martha S. Field, [mas246@cornell.edu](mailto:mas246@cornell.edu), (607) 255-6081

10 113 Savage Hall, Division of Nutritional Sciences, Ithaca, NY 14853, USA

11  
12 **Running title:** Erythritol synthesis is elevated by oxidative stress

13 **Funding sources:** This work is supported by Hatch Federal Capacity Funds [grant no. 7000420]  
14 from the USDA National Institute of Food and Agriculture to MSF. This work was supported by  
15 the Education and Workforce Development Predoctoral Fellowship [grant no. 2021-67034-  
16 35110/project accession no. 1026400] from the USDA National Institute of Food and  
17 Agriculture to SRO. AH is supported by the Federal State of Lower Saxony, Niedersächsisches  
18 Vorab (VWZN3266).

19

## 20 **Abstract**

21 Erythritol is a predictive biomarker of cardiometabolic diseases and is produced from  
22 glucose metabolism through the pentose phosphate pathway (PPP). Little is known regarding the  
23 regulation of endogenous erythritol synthesis in humans. In the present study, we investigated  
24 the stimuli that promote erythritol synthesis in human cells and characterized potential points of  
25 regulation along the PPP. Human A549 lung carcinoma cells were chosen for their known ability  
26 to synthesize erythritol. A549 cells were treated with potential substrates for erythritol  
27 production, including glucose, fructose, and glycerol. Using siRNA knockdown, we assessed the  
28 necessity of enzymes G6PD, TKT, TALDO, and SORD for erythritol synthesis. We also used  
29 position-specific <sup>13</sup>C-glucose tracers to determine whether the carbons for erythritol synthesis are  
30 derived directly from glycolysis or through the oxidative PPP. Finally, we assessed if erythritol  
31 synthesis responds to oxidative stress using chemical and genetic models. Intracellular erythritol  
32 was directly associated with media glucose concentration. In addition, siRNA knockdown of  
33 TKT or SORD inhibited erythritol synthesis, whereas siG6PD did not. Both chemically induced  
34 oxidative stress and constitutive activation of the antioxidant response transcription factor NRF2  
35 elevated intracellular erythritol. Our findings indicate that erythritol synthesis is proportional to  
36 flux through the PPP and is regulated by non-oxidative PPP enzymes.

37 Key words: erythritol, oxidative stress, pentose phosphate pathway

38

## 39 **1. Introduction**

40 Serum erythritol is a predictive biomarker of chronic disease onset and associated  
41 complications. In one large prospective cohort, baseline serum erythritol was elevated in subjects  
42 who developed cardiovascular disease (CVD) or type 2 diabetes mellitus (T2DM) up to 20 years  
43 later [1,2]. Another recent study compared patients with cardiovascular risk factors who did and  
44 did not develop coronary artery disease. Serum erythritol was significantly elevated in those who  
45 did develop coronary artery disease. Erythritol has also been shown to predict risk for diabetic  
46 complications including retinopathy, nephropathy, and arterial stiffness [3–5]. Serum erythritol  
47 appears to be an early, general marker of cardiometabolic dysfunction.

48 Erythritol is a four-carbon polyol that was recently found to be endogenously synthesized  
49 in humans. Little is known regarding the regulation of erythritol synthesis. Hootman et al. first  
50 demonstrated that erythritol is produced from glucose in humans through the pentose phosphate

51 pathway (PPP) [6]. It was further identified that the enzymes sorbitol dehydrogenase (SORD)  
52 and alcohol dehydrogenase 1 (ADH1) are responsible for catalyzing the final step in erythritol  
53 synthesis from glucose (namely conversion of erythrose to erythritol) using the cofactor NADPH  
54 [7].

55 The PPP branches off from glycolysis and fuels anabolic reactions. It consists of two  
56 phases: the oxidative PPP and the non-oxidative PPP. The oxidative PPP generates NADPH,  
57 which is essential for endogenous antioxidant generation and lipid synthesis. The non-oxidative  
58 PPP consists of a series of sugar interconversions that provide precursors for nucleotide  
59 synthesis. The non-oxidative phase can convert pentoses back to glycolytic intermediates  
60 through reversible reactions. PPP metabolism plays roles in the development of cardiometabolic  
61 diseases across multiple organs. The rate limiting enzyme of the PPP, glucose-6-phosphate  
62 dehydrogenase (G6PD), is elevated in the adipose tissue and skeletal muscle of prediabetic  
63 subjects [8,9]. In adipose tissue, elevated G6PD promotes pro-inflammatory macrophages,  
64 exacerbating insulin resistance [9]. In skeletal muscle cells, inhibition of G6PD can improve  
65 insulin-stimulated glucose uptake [8]. PPP flux is also important in the liver, where NADPH  
66 synthesis can contribute to fatty liver development [10].

67 As a product of the PPP, erythritol synthesis may be an indicator of high PPP flux and the  
68 associated aberrant changes in glucose metabolism. The purpose of this study was to identify the  
69 upstream factors that regulate erythritol synthesis. Our findings highlight that erythritol synthesis  
70 is increased in response to PPP stressors and is primarily regulated by glucose availability and  
71 activity of enzymes within the non-oxidative PPP.

## 72 **2. Methods**

### 73 **2.1 Cell culture and treatment with carbohydrates**

74 A549 cells were obtained from ATCC (CCL-185) and maintained in Minimum Essential  
75 Medium Alpha Modification (MEM Alpha) containing ribonucleosides, deoxyribonucleosides,  
76 phenol red, and l-glutamine, 1% penicillin/streptomycin (Cytiva), and 10% FBS (Cytiva).

77 KEAP1 variant cells were maintained in MEM Alpha with the addition of 1  $\mu\text{g}/\text{mL}$  puromycin.

78 HK-2 cells were obtained from ATCC (CRL-2190) and cultured in Dulbecco's Modified Eagle  
79 Medium (DMEM) (Corning) with 1% penicillin/streptomycin and 10% FBS (Cytiva).

80 Unless otherwise noted, cells were seeded at a density of  $1.5\text{-}2 \times 10^5$  cells per well in 6-  
81 well plates and allowed to proliferate overnight before treatment. For initial characterization of

82 erythritol production from glucose and fructose, modified glucose-free DMEM (Hyclone) was  
83 prepared to contain 6.25, 12.5, or 25 mM glucose or 25 mM fructose. All further measurements  
84 (including knockdowns and metabolic assays) were performed in standard MEM Alpha or  
85 DMEM (5.5 mM glucose) with additional glucose, mannitol, or glycerol added to achieve  
86 desired concentrations of each carbohydrate. Cells were incubated with carbohydrates for 48 h,  
87 then polar metabolites were extracted, and relative cell number was measured by MTT.

## 88 **2.2 Extraction and measurement of polar metabolites by GC-MS**

89 Polar metabolites were extracted following the protocol for adherent cells by Sapcariu et  
90 al [11]. 10  $\mu$ M  $^{13}\text{C}_1$ -ribitol (Cambridge Isotope Laboratories) was added to methanol as an  
91 internal standard during extraction. Dried extracts were derivatized and metabolites (erythritol,  
92  $^{13}\text{C}_1$ -ribitol, and sorbitol) were measured by GC-MS as previously described [12]. In SIM mode,  
93 mass spectra of erythritol ( $m/z$  217),  $^{13}\text{C}_1$ -ribitol ( $m/z$  218), and sorbitol ( $m/z$  319) were acquired  
94 from 8-9 min, 10-11 min, and 12-13 min, respectively. Metabolite peaks were selected based on  
95 the retention time of their respective standards. Relative erythritol and sorbitol were calculated  
96 by dividing their absolute intensity by the absolute intensity of  $^{13}\text{C}_1$ -ribitol. Relative erythritol  
97 and sorbitol were then normalized to cell number, measured by MTT.

## 98 **2.3 MTT assay for relative cell number**

99 MTT reagent (MP Bio) dissolved in 1X PBS (5 mg/mL) was added to culture medium to  
100 a final concentration of 0.16 mg/mL. Cells were incubated for 4 hours at 37°C, after which  
101 media and MTT reagent were removed. Formazan crystals were solubilized in 1 mL DMSO,  
102 diluted 1:10 in additional DMSO, then transferred to a microplate to quantify  $A_{570}$  using a Biotek  
103 plate reader.

## 104 **2.4 Knockdown of *SORD*, *G6PD*, *TKT*, and *TALDO* using siRNA**

105 Non-targeting control siRNA and siRNA targeting *SORD*, *G6PD*, *TKT*, and *TALDO* were  
106 purchased from Horizon Discovery. Product numbers and sequences are provided in Table S1.  
107 A549 cells were reverse transfected using RNAiMAX (Thermo Fisher Scientific) according to  
108 manufacturer's instructions. Per well (6-well plate), 2  $\mu$ L of 20  $\mu$ M siRNA and 5  $\mu$ L RNAiMAX  
109 were diluted in 400  $\mu$ L OptiMEM (Thermo Fisher Scientific), mixed gently and incubated for 20  
110 min at room temperature. The solution was applied to the well 5 min prior cell seeding.  $2 \times 10^5$   
111 cells were seeded in 1600  $\mu$ L standard 5.5 mM glucose MEM Alpha or 25 mM glucose MEM  
112 Alpha. Transfected cells were incubated for 48 h until metabolite extraction or measurement of

113 cell density by MTT.

## 114 **2.5 Measurement of intracellular NADPH and metabolic phenotype**

115 For measurement of NADPH or metabolic phenotype in 96-well plates, cells were  
116 transfected as described with reagents adjusted to a provide final volume of 200  $\mu$ L per well: 0.1  
117  $\mu$ L siRNA, 0.25  $\mu$ L RNAiMAX, and 20  $\mu$ L OptiMEM, and 180  $\mu$ L of culture medium.

118 NADPH was measured following reverse transfection using the NADP/NADPH-Glo™  
119 Assay (Promega). Briefly,  $7 \times 10^3$  cells per well were reverse transfected with siRNA targeting  
120 control, *SORD*, or *G6PD* and incubated for 48 h in standard (5.5 mM glucose) or 25 mM glucose  
121 MEM Alpha. To measure NADPH individually, culture media was aspirated and replaced with  
122 50  $\mu$ L 1X PBS and 50  $\mu$ L of 0.2 N NaOH with 1% DTAB to lyse cells. 50  $\mu$ L of cell lysate was  
123 transferred to a white 96-well luminometer plate then incubated for 15 min at 60C followed by  
124 10 minutes at room temperature. The base was neutralized with 50  $\mu$ L Trizma/HCL, then  
125 NADPH was measured as described in the manufacturer's protocol.

126 Oxygen consumption rate (OCR) and extracellular acidification (ECAR) were measured  
127 using the Seahorse XF Cell Energy Phenotype Test Kit (Agilent).  $12 \times 10^3$  cells per well were  
128 reverse transfected with siRNA control or targeting *SORD* in a Seahorse XF24 Cell Culture  
129 Microplate (Agilent) with MEM Alpha adjusted to 10 mM glucose. 10 mM glucose was chosen  
130 to match the Assay Buffer glucose concentration. After 48 h, baseline OCR and ECAR were  
131 measured following the manufacturer's protocol in Seahorse Assay Buffer (phenol red-free  
132 DMEM with 1 mM pyruvate, 2 mM glutamine, and 10 mM glucose).

## 133 **2.6 Western blot analysis**

134 Cells were lifted using 0.25% trypsin-EDTA, pelleted, and rinsed once with 1X PBS.  
135 Cell pellets were lysed by sonication in lysis buffer containing 15% NaCl, 5 mM EDTA (pH 8),  
136 1% Triton X100, 10 mM Tris-Cl, 5 mM DTT, and 10  $\mu$ L/mL protease inhibitor cocktail (Sigma  
137 Aldrich). Protein concentration was determined with a modified Lowry assay [13]. Equal  
138 amounts of protein (15-25  $\mu$ g) were loaded onto a 10% SDS gel and transferred to a PVDF  
139 membrane (MilliporeSigma). Membranes were blocked overnight at 4C in 5% non-fat milk,  
140 incubated in primary antibody overnight at 4C, then incubated with secondary antibody for 1 hr  
141 at room temperature. Primary antibodies against alpha tubulin (ATUB), KEAP1, GAPDH, G6PD  
142 (Cell Signaling Technology), *SORD*, TALDO, and TKT (ProteinTech) were diluted 1:1000.  
143 Secondary anti-rabbit and anti-mouse antibodies were diluted 1:50,000 (ThermoFisher). After

144 antibody incubation, blots were imaged using a Protein Simple FluorChem E with Clarity  
145 Western ECL Substrate (Bio-Rad). Band intensity was measured using ImageJ (NIH).

## 146 **2.7 <sup>13</sup>C-glucose tracing**

147 To measure the incorporation of labelled glucose in endogenous erythritol, modified  
148 glucose-free DMEM (Hyclone) was adjusted to 25 mM glucose with either 1-<sup>13</sup>C-glucose or 6-  
149 <sup>13</sup>C-glucose (Cambridge Isotope Laboratories). Cells were reverse transfected as described  
150 above, incubated with labelled glucose for 48 h, then polar metabolites were harvested and  
151 measured by GCMS. The mass spectra were acquired for erythritol from *m/z* 320 (M0) to *m/z*  
152 324 (M4). Mass isotope distribution was calculated as previously described [6].

## 153 **2.8 Treatment with hydrogen peroxide**

154 Cells were seeded at  $2 \times 10^5$  cells per well in 6-well plates and allowed to proliferate  
155 overnight. The following day, cells were treated with water or hydrogen peroxide ranging from  
156 150-600  $\mu$ M hydrogen peroxide for either 6 or 8 h. After treatment, polar metabolites and  
157 relative cell number were measured. The percentage of live cells was determined using trypan  
158 blue staining quantified using a TC10 Automated Cell Counter (Bio-Rad). To determine  
159 intracellular NADPH and oxidized glutathione (GSSG),  $7 \times 10^3$  cells/well in a 96-well plate were  
160 treated with hydrogen peroxide, then NADPH was measured as described above. GSSG was  
161 measured using the GSH/GSSG-Glo assay (Promega) per the manufacturer's protocol.

## 162 **2.9 Statistical Analysis**

163 All statistical analyses were conducted in GraphPad Prism 9 (GraphPad Software). All  
164 data are shown as mean  $\pm$  SD, and p-values lower than 0.05 were considered statistically  
165 significant. Comparisons between two groups were analyzed by unpaired t-test. Comparisons  
166 between more than two groups were analyzed by one-way ANOVA followed by Tukey's  
167 multiple comparisons test or two-way ANOVA with Sidak's or Tukey's multiple comparisons  
168 test.

## 169 **3. Results**

### 170 **3.1 Intracellular erythritol increases in response to glucose and fructose in culture medium**

171 A549 cells were used to assess the contribution of substrate availability to erythritol  
172 synthesis given their robust PPP activity and known ability to generate erythritol [7]. As  
173 expected, intracellular erythritol was significantly higher in A549 cells cultured in 25 mM  
174 glucose compared to 6.25 mM glucose (Fig. 1A,  $p < 0.0001$ ). In the absence of glucose, 25 mM



175 fructose also significantly increased erythritol compared to the 6.25 mM glucose control (Fig.  
176 1A,  $p < 0.05$ ). Treatment with 25 mM mannitol was performed as a control for the osmotic stress  
177 induced by high-glucose (25 mM) media. Mannitol treatment did not significantly increase  
178 intracellular erythritol compared to 5.5 mM glucose controls (Fig. 1B). Sorbitol accumulation is  
179 one mechanism of responding to hyperosmolarity [14]. Measurement of intracellular sorbitol  
180 confirmed the strong induction of osmotic stress in mannitol-treated cells. Mannitol elevated  
181 sorbitol nearly 40-fold above 5.5 mM glucose and 5-fold above 25 mM glucose-treated cells  
182 (Fig. 1C,  $p < 0.0001$ ). Sorbitol accumulation was also modestly induced by 25 mM glucose  
183 compared to control media, as expected due to increased flux through the polyol pathway as a  
184 result of increased glucose (Fig. 1C,  $p < 0.05$ )[14].

185 We also evaluated the effect of exposure to excess glycerol, which acts as both an  
186 osmolyte and an alternative carbon source, on erythritol synthesis. There was no significant  
187 difference in erythritol content in cells treated with 5.5 mM glucose and 5.5 mM glucose media  
188 containing 0.25 mM or 0.5 mM glycerol (Fig. 1D). In contrast, sorbitol was significantly higher  
189 in cells treated with 0.5 mM glycerol compared to control cells (Fig. 1E,  $p < 0.01$ ).

190 We have previously demonstrated that in mice, the liver and kidney are primary  
191 contributors to endogenous erythritol synthesis [12]. We therefore repeated exposure to 5.5 mM  
192 or 25 mM glucose media in HK-2 cells, a human proximal tubular cell line derived from normal  
193 kidney cells. High glucose media caused a 40% increase in erythritol in HK-2 cells (Fig. 2,  $p <$   
194  $0.001$ ). Collectively, these findings demonstrate that erythritol synthesis is elevated in response  
195 to glucose availability and not because of osmotic stress.

### 196 **3.2 Reduction of SORD decreases erythritol synthesis and NADPH availability**

197 As previously described, erythritol is synthesized from glucose through the PPP in  
198 mammalian cells [6,7]. To determine the rate-limiting step in erythritol synthesis, we reduced  
199 expression of SORD and G6PD using siRNA. G6PD is generally considered the rate-limiting  
200 enzyme of the PPP. Unexpectedly, we found that in 5.5 mM glucose media, reduction of neither  
201 enzyme affected intracellular erythritol levels (Fig. 3A). Knockdown of SORD and G6PD were  
202 validated by western blot (Fig. 3B). When exposed to 25 mM glucose media, siControl and  
203 siG6PD cells both had significantly higher erythritol compared to cells cultured in 5.5 mM  
204 glucose (Fig. 3A,  $p < 0.001$  and  $p < 0.0001$ , respectively). siSORD cells did have reduced  
205 intracellular erythritol in response to hyperglycemia (Fig. 3A), consistent with previous findings

206 [7]. These data demonstrate that, in A549 cells, erythritol synthesis is limited by *SORD*  
207 expression but not by *G6PD* expression in response to high-glucose culture medium.

208 Erythritol synthesis uses the coenzyme NADPH, which is produced by G6PD during the  
209 first steps of the PPP. We found that in both 5.5 mM and 25 mM glucose media, siG6PD  
210 significantly reduced intracellular NADPH compared to siControl and siSORD treated cells (Fig.  
211 3C,  $p < 0.001$ ). SORD knockdown did not significantly modify NADPH compared to control  
212 cells at either glucose concentration (Fig. 3C). Taken together, these findings suggest that  
213 erythritol synthesis is not affected by changes in intracellular NADPH.

214 We also assessed the effect of siSORD on cellular energy metabolism using real-time cell  
215 metabolic analysis (i.e. Agilent Seahorse technology). SORD knockdown significantly increased  
216 extracellular acidification rate (ECAR) (Fig. 3D,  $p < 0.01$ ) and did not significantly change the  
217 oxygen consumption rate (OCR) (Fig. 3D). The increase in ECAR without significant changes to  
218 OCR likely indicates that when SORD expression is reduced, glycolysis and subsequent  
219 secretion of lactate are elevated.

### 220 **3.3 Knockdown of the non-oxidative PPP enzyme transketolase reduces erythritol synthesis**

221 The PPP consists of an oxidative phase, for which G6PD is rate-limiting, and a non-  
222 oxidative phase. The non-oxidative PPP, which provides erythrose (via erythrose-4-phosphate)  
223 for erythritol synthesis, requires the activities of transketolase (TKT) and transaldolase (TALDO)  
224 enzymes. Indeed, knockdown of TKT expression in cell cultured in high-glucose media  
225 significantly reduced intracellular erythritol levels (Fig. 4A,  $p < 0.01$ ). This decrease in erythritol  
226 was of the same magnitude as siSORD (Fig. 4A,  $p < 0.01$ ). Reduction of TALDO, however, did  
227 not significantly reduce intracellular erythritol compared to siControl cells (Fig. 4A). Successful  
228 knockdown of these enzymes was validated by western blot (Fig. 4B and 4C).

229 Given the effect of increasing glucose in media on erythritol synthesis, we assessed if  
230 high glucose also effected SORD and TKT expression. We found no significant difference  
231 SORD or TKT expression between 5.5 mM and 25 mM glucose-treated cells (Fig. 5A and 5B).

### 232 **3.4 Glucose-derived erythritol carbons originate from the PPP**

233 We used position-specific [ $^{13}\text{C}$ ]-glucose tracing to determine if carbons for erythritol  
234 synthesis must first pass through the oxidative PPP, or can be derived directly from glycolysis  
235 through fructose-6-phosphate and glyceraldehyde-3-phosphate catalyzed by TKT and TALDO  
236 (Fig. 6A). 1- $^{13}\text{C}$ -glucose would be incorporated into erythritol through glycolysis, whereas 6-



237 [<sup>13</sup>C]-glucose is incorporated through the PPP (Fig. 6A). We found that in cells treated with 1-  
238 [<sup>13</sup>C]-glucose, incorporation of labelled carbons into erythritol was 0% (M1 erythritol) (Fig. 6B).  
239 Contrastingly, treatment with 6-[<sup>13</sup>C]-glucose in siControl cells resulted in 60% M1 erythritol  
240 incorporation (Fig. 6C). Treatment with siSORD or siTKT also significantly reduced  
241 incorporation of 6-[<sup>13</sup>C]-glucose carbons into M1 erythritol (Fig. 6C,  $p < 0.0001$  and  $p < 0.05$ ).  
242 Consistent with previous findings, under high glucose conditions all erythritol carbons are  
243 derived from the oxidative PPP, but erythritol synthesis is limited by the enzymes SORD and  
244 TKT in the non-oxidative PPP [6,7].

### 245 **3.5 Oxidative stress induces erythritol synthesis**

246 We found that treatment with hydrogen peroxide for 8 hours significantly increased  
247 intracellular erythritol without significantly decreasing the percentage of live cells (Fig. 7A,  $p <$   
248  $0.0001$ , and 6B). As expected, hydrogen peroxide also caused a significant increase in oxidized  
249 glutathione (Fig. 7C,  $p < 0.0001$ ) and reduction in intracellular NADPH (Fig. 7D,  $p < 0.01$ ).  
250 These findings suggest that erythritol synthesis is increased in response to oxidative stress and  
251 support the previous observation that decreased NADPH levels do not affect erythritol synthesis  
252 capacity (Fig. 3C).

### 253 **3.6 Keap1 mutations alter response to glucose and oxidative stress**

254 We hypothesized that the increase in intracellular erythritol in response to high glucose  
255 and oxidative stress may be mediated by NRF2. To test this hypothesis, we utilized A549 cells  
256 that stably express either ectopic wildtype (WT) KEAP1 or the cysteine-to-serine mutations  
257 C273S and C151S [15,16]. The mutation C273S impairs the ability of KEAP1 to repress NRF2,  
258 resulting in constitutively active NRF2. C151S results in constitutive repression of NRF2 [16].

259 We confirmed that the A549 KEAP1 mutants differentially express KEAP1 and G6PD, a  
260 downstream target of NRF2 (Fig. 8A and 8B). Cells expressing WT, C151S, and C273S all  
261 significantly increase intracellular erythritol in 25mM glucose media (Fig. 9A,  $p < 0.001$ ). The  
262 magnitude of this response, however, differed by KEAP1 status: C273S cells had 2 and 3-fold  
263 higher erythritol in 25mM glucose media compared to WT and C151S-expressing cells (Fig.  
264 9A). This finding indicates that constitutively active NRF2 results in the most robust increase in  
265 erythritol synthesis from exposure to high-glucose in culture medium. We found a similar pattern  
266 in intracellular sorbitol. All cells responded to 25mM glucose by increasing sorbitol (Fig. 9B,  $p <$   
267  $0.0001$ ), but C273S cells accumulated 2-fold more sorbitol than cells with lower NRF2

268 expression.

269 Treatment with 300  $\mu$ M hydrogen peroxide for 5 hours elevated erythritol in KEAP1 WT  
270 and C151S cells (Fig. 9C,  $p < 0.0001$ ). There was no difference in C273S cells (Fig. 9C).

271 Oxidized glutathione was also significantly elevated in KEAP1 WT and C151S, but not C273S  
272 cells (Fig. 9E,  $p < 0.05$ ). Importantly, treatment with 600  $\mu$ M hydrogen peroxide caused  
273 significant cell death in KEAP1 WT and C151S cells, indicating impaired response to oxidative  
274 stress in cells with reduced NRF2 activity. This finding is supported by the relative resistance of  
275 the C273S cells, which have constitutively active NRF2. Intracellular sorbitol also increased in  
276 response to 300  $\mu$ M hydrogen peroxide in all 3 cell types, which indicates an accumulation of  
277 intracellular glucose (Fig. 9D,  $p < 0.05$ ) and possible inhibition of glycolysis under these  
278 conditions.

#### 279 **4. Discussion**

280 Previous literature has identified that, in mammals, erythritol is synthesized from glucose  
281 through the pentose phosphate pathway [6]. Erythritol synthesis from erythrose can be catalyzed  
282 by SORD and ADH1 using NADPH as a cofactor [7]. The precursor of erythrose is erythrose-4-  
283 phosphate, which is a product of the non-oxidative PPP. The regulation of erythritol synthesis  
284 and its role in metabolic homeostasis, however, is poorly understood [17]. Here, we demonstrate  
285 that erythritol synthesis is modulated both by glucose availability and oxidative stress. We  
286 observed that intracellular erythritol increased dose-dependently with increasing glucose in  
287 culture media (Fig. 1A). Interestingly, we also demonstrated that in the absence of glucose,  
288 erythritol synthesis is still elevated by exposure to 25 mM fructose compared to 6.25 mM  
289 glucose (Fig. 1A). This elevation is modest, however, when compared to the response to 25 mM  
290 glucose media. In A549 cells, fructose is converted to glycolytic intermediates that are primarily  
291 used for fatty acid synthesis [18,19]. Fatty acid oxidation utilizes NADPH, thus increasing the  
292 demand for NADPH regeneration in the oxidative pentose phosphate pathway [19]. Fructose,  
293 then, may promote erythritol synthesis directly through increased glycolytic intermediates or  
294 through increased PPP flux.

295 In addition to increased nutrient availability, excess carbohydrates are a source of  
296 osmotic stress in cell culture. In yeast, erythritol synthesis can be induced by osmotic stress [20].  
297 In humans, the 6-carbon polyol sorbitol is also known to be elevated during osmotic stress  
298 [14,21]. To evaluate if erythritol synthesis is an additional mechanism of osmoregulation, we

299 treated cells with mannitol. Mannitol is strong osmolyte that undergoes little metabolism in  
300 humans [22]. Interestingly, mannitol treatment did not affect intracellular erythritol, whereas  
301 sorbitol was significantly elevated (Fig 1B, 1C). This may be explained by differing capacities  
302 for diffusion across the plasma membrane. Erythritol more readily diffuses across cell  
303 membranes than the larger polyol sorbitol [22]. Sorbitol, therefore, is likely a more effective  
304 endogenous osmolyte to combat hyperosmotic stress than is erythritol.

305 Yeast also use glycerol as a substrate for erythritol synthesis by converting glycerol to  
306 glyceraldehyde-3-phosphate, a precursor of erythrose-4-phosphate in the non-oxidative PPP [20].  
307 Based on the finding that fructose, another direct precursor of erythrose-4-phosphate, elevated  
308 erythritol, we expected that glycerol treatment would produce similar results in human cells. In  
309 further support that erythritol does not respond to osmotic stress in human cells, 0.5 mM glycerol  
310 significantly increased intracellular sorbitol, but did not impact intracellular erythritol (Fig 1D,  
311 1E). Collectively, these data support that erythritol is produced in response to carbohydrate  
312 abundance and not in response to osmotic stress.

313 A549 cells are derived from cancerous tissue, which is known for high PPP activity  
314 [23,24]. We aimed to evaluate if non-cancerous cells exhibit the same increase in erythritol in  
315 response to high glucose conditions. We chose to use HK-2 cells based on our previous work  
316 showing that the kidney contains relatively high endogenous erythritol in mice [12]. Indeed, we  
317 found that HK-2 cells also respond to excess glucose with an increase in intracellular erythritol  
318 (Fig 2), consistent with previous observations of increased PPP flux in HK-2 cells cultured in  
319 hyperglycemic hypoxic conditions [25]. This demonstrates that glucose availability can also  
320 regulate synthesis in non-cancerous erythritol-producing cells.

321 Our work validated the previous finding that SORD knockdown significantly decreases  
322 erythritol synthesis [7], as previous experiments were conducted in media containing 25 mM  
323 glucose [7]. This is the first study to report that the effect of SORD knockdown on intracellular  
324 erythritol is dependent on glucose level. In basal glucose media (5.5 mM), siSORD does not  
325 significantly decrease intracellular erythritol whereas in high glucose media (25 mM glucose),  
326 siSORD caused a 40% reduction (Fig 3A). This further supports the primary role of glucose  
327 availability in the synthesis of erythritol.

328 G6PD is the rate-limiting enzyme of the PPP. We expected, then, that knockdown of  
329 G6PD would result in reduced intracellular erythritol in high-glucose media. Interestingly, G6PD

330 knockdown did not blunt the glucose-induced increase in erythritol (Fig. 3A). One explanation  
331 for this is the paradoxical finding by Zhao et al. that in A549 cells, the constitutive activation of  
332 NRF2 results in both high expression of oxidative PPP enzymes and reduced dependence on the  
333 oxidative PPP for cell growth [15]. Another study in melanoma cells, which also have high PPP  
334 activity, found that when G6PD function was impaired, there was no reduction in erythrose-4-  
335 phosphate levels [26]. These studies demonstrate that cancer cells are resilient to G6PD  
336 inhibition and may continue to fuel the non-oxidative PPP through alternative methods.

337 We next evaluated the impact of knocking down the downstream non-oxidative PPP  
338 enzymes TKT and TALDO. We found that knocking down *TKT*, but not *TALDO*, reduced  
339 erythritol in 25 mM glucose media by a similar magnitude as *SORD* knockdown (Fig. 4A). This  
340 is consistent with historic reports that *TALDO* deficiency resulted in accumulation, rather than  
341 depletion, of erythritol and other polyols in plasma and urine [27,28]. Our findings indicate that  
342 both *SORD* and *TKT* expression are essential for the synthesis of erythritol.

343 TKT participates in two reversible sugar conversions in the non-oxidative PPP. The  
344 TKT-catalyzed reaction erythrose-4-phosphate + xylulose-5-phosphate  $\leftrightarrow$  fructose-6-phosphate  
345 + glyceraldehyde-3-phosphate is a bridge by which carbons can be passed between glycolysis  
346 and the PPP. Because siG6PD did not limit erythritol synthesis, but siTKT did, we aimed to  
347 understand if erythritol synthesis is being supported by carbons directly from glycolytic  
348 intermediates when glucose availability is high. We found using position-specific [<sup>13</sup>C]-glucose  
349 tracing that when G6PD expression is not altered, glucose passes through the oxidative PPP  
350 before incorporation into erythritol (Fig. 6 A-C). This is in agreement with the previous finding  
351 that in A549 cells, all erythritol was derived from glucose passed through the oxidative PPP [6].

352 Flux through the PPP is a key defense mechanism to combat oxidative stress, primarily  
353 through generation of reducing equivalents as NADPH. We hypothesized that oxidative stress,  
354 therefore, would also elevate synthesis of erythritol. As expected, we found that intracellular  
355 erythritol is elevated in A549 cells exposed to hydrogen peroxide (Fig. 7A). Interestingly,  
356 erythritol synthesis capacity is not associated with intracellular NADPH levels—in fact,  
357 erythritol was elevated with hydrogen peroxide treatment when NADPH was depleted (Fig. 7D).  
358 Similarly, G6PD knockdown depleted intracellular NADPH, but did not affect erythritol levels  
359 (Fig. 3C). Together, these findings suggest that flux of glucose through G6PD and intracellular  
360 NADPH are sufficient, even when NADPH is reduced, to support erythritol synthesis.

361 We further explored the relationship between oxidative stress and erythritol utilizing  
362 A549 *KEAP1* mutant cells with altered activity of NRF2 [15,16]. NRF2 directs glucose flux  
363 through the PPP by modifying enzyme expression [29,30]. We found that constitutively active  
364 NRF2 intensified glucose-induced erythritol synthesis, resulting in even higher erythritol levels  
365 than cells with normal or impaired NRF2 (Fig. 9A). Notably, cells with constitutively active  
366 NRF2 did not have higher intracellular erythritol at baseline. This suggests that the co-  
367 occurrence of hyperglycemia and oxidative stress may be a key factor in elevating erythritol  
368 synthesis.

369 We also found that impairing NRF2 did not eliminate erythritol synthesis during  
370 oxidative stress but did lower the threshold for this response. In parental A549 cells, 600  $\mu$ M  
371 hydrogen peroxide induced oxidative stress and elevated intracellular erythritol (Fig. 7A). This  
372 dose was highly cytotoxic to cells with ectopic WT *KEAP1* or the NRF2-repressing C151S  
373 mutation. WT *KEAP1* and C151S cells increased erythritol synthesis following treatment with  
374 half the dose, 300  $\mu$ M hydrogen peroxide (Fig. 9C). Erythritol synthesis during oxidative stress  
375 may be due both NRF2-dependent and NRF2-independent mechanisms, as oxidative stress  
376 inhibits the activity of several glycolytic enzymes through mechanisms that are not dependent on  
377 NRF2, promoting the accumulation of glycolytic intermediates [23,24]. We also observed  
378 significant accumulation of sorbitol in *KEAP1* WT and C151S cells under oxidative stress (Fig.  
379 9D). This supports that intracellular glucose is elevated, likely due to the inhibition of glycolytic  
380 enzymes, which promotes alternative pathways (i.e. sorbitol and erythritol synthesis through the  
381 polyol and PPP, respectively). Overall, our findings in *KEAP1* mutant cells further indicate that  
382 elevated erythritol synthesis is a marker of glucose flux through the PPP.

383 In humans, elevated circulating erythritol is a predictive biomarker of cardiometabolic  
384 diseases [17]. Our findings provide a connection between erythritol regulation and hallmarks of  
385 cardiometabolic disease: hyperglycemia and oxidative stress [31,32]. We demonstrated that  
386 erythritol is elevated by both hyperglycemia and oxidative stress, and that these effects can  
387 compound to further promote erythritol synthesis. Further research characterizing whole-body  
388 erythritol homeostasis may provide a powerful tool for detecting early cardiometabolic  
389 dysfunction.

390 **Acknowledgements**

391 The authors are grateful to Christian Metallo for the generous gift of the A549 KEAP1  
392 over-expression cell lines (WT and mutants).

### 393 **Author Contributions**

394 **Semira R. Ortiz:** Conceptualization, Methodology, Investigation, Visualization, Writing –  
395 Original draft preparation. **Alexander Heinz:** Methodology and Software. **Karsten Hiller:**  
396 Methodology. **Martha S. Field:** Conceptualization, Supervision, Writing – Review and Editing.  
397

### 398 **References**

- 399 [1] Wang Z, Zhu C, Nambi V, Morrison AC, Folsom AR, Ballantyne CM, et al. Metabolomic  
400 Pattern Predicts Incident Coronary Heart Disease: Findings From the Atherosclerosis Risk  
401 in Communities Study. *Arterioscler Thromb Vasc Biol* 2019;39:1475–82.  
402 <https://doi.org/10.1161/ATVBAHA.118.312236>.
- 403 [2] Rebholz CM, Yu B, Zheng Z, Chang P, Tin A, Köttgen A, et al. Serum metabolomic profile  
404 of incident diabetes. *Diabetologia* 2018;61:1046–54. [https://doi.org/10.1007/s00125-018-](https://doi.org/10.1007/s00125-018-4573-7)  
405 [4573-7](https://doi.org/10.1007/s00125-018-4573-7).
- 406 [3] Shao M, Lu H, Yang M, Liu Y, Yin P, Li G, et al. Serum and urine metabolomics reveal  
407 potential biomarkers of T2DM patients with nephropathy. *Ann Transl Med* 2020;8:199–  
408 199. <https://doi.org/10.21037/atm.2020.01.42>.
- 409 [4] Chen L, Cheng C-Y, Choi H, Ikram MK, Sabanayagam C, Tan GSW, et al. Plasma  
410 Metabonomic Profiling of Diabetic Retinopathy. *Diabetes* 2016;65:1099–108.  
411 <https://doi.org/10.2337/db15-0661>.
- 412 [5] Katakami N, Omori K, Taya N, Arakawa S, Takahara M, Matsuoka T, et al. Plasma  
413 metabolites associated with arterial stiffness in patients with type 2 diabetes. *Cardiovasc*  
414 *Diabetol* 2020;19. <https://doi.org/10.1186/s12933-020-01057-w>.
- 415 [6] Hootman KC, Trezzi J-P, Kraemer L, Burwell LS, Dong X, Guertin KA, et al. Erythritol is  
416 a pentose-phosphate pathway metabolite and associated with adiposity gain in young adults.  
417 *Proc Natl Acad Sci* 2017;114:E4233–40. <https://doi.org/10.1073/pnas.1620079114>.
- 418 [7] Schlicker L, Szebenyi DME, Ortiz SR, Heinz A, Hiller K, Field MS. Unexpected roles for  
419 ADH1 and SORD in catalyzing the final step of erythritol biosynthesis. *J Biol Chem*  
420 2019;jbc.RA119.009049. <https://doi.org/10.1074/jbc.RA119.009049>.
- 421 [8] Lee-Young RS, Hoffman NJ, Murphy KT, Henstridge DC, Samocha-Bonet D, Siebel AL,  
422 et al. Glucose-6-phosphate dehydrogenase contributes to the regulation of glucose uptake in  
423 skeletal muscle. *Mol Metab* 2016;5:1083–91.  
424 <https://doi.org/10.1016/j.molmet.2016.09.002>.
- 425 [9] Ge T, Yang J, Zhou S, Wang Y, Li Y, Tong X. The Role of the Pentose Phosphate Pathway  
426 in Diabetes and Cancer. *Front Endocrinol* 2020;11.  
427 <https://doi.org/10.3389/fendo.2020.00365>.
- 428 [10] Jin ES, Lee MH, Murphy RE, Malloy CR. Pentose phosphate pathway activity parallels  
429 lipogenesis but not antioxidant processes in rat liver. *Am J Physiol - Endocrinol Metab*  
430 2018;314:E543–51. <https://doi.org/10.1152/ajpendo.00342.2017>.
- 431 [11] Sapcariu SC, Kanashova T, Weindl D, Ghelfi J, Dittmar G, Hiller K. Simultaneous  
432 extraction of proteins and metabolites from cells in culture. *MethodsX* 2014;1:74–80.



- 433 <https://doi.org/10.1016/j.mex.2014.07.002>.
- 434 [12] Ortiz SR, Field MS. Chronic Dietary Erythritol Exposure Elevates Plasma Erythritol  
435 Concentration in Mice but Does Not Cause Weight Gain or Modify Glucose Homeostasis. *J*  
436 *Nutr* 2021;151:2114–24. <https://doi.org/10.1093/jn/nxab130>.
- 437 [13] Bensadoun A, Weinstein D. Assay of proteins in the presence of interfering materials. *Anal*  
438 *Biochem* 1976;70:241–50. [https://doi.org/10.1016/s0003-2697\(76\)80064-4](https://doi.org/10.1016/s0003-2697(76)80064-4).
- 439 [14] Burg MB, Kador PF. Sorbitol, osmoregulation, and the complications of diabetes. *J Clin*  
440 *Invest* 1988;81:635–40. <https://doi.org/10.1172/JCII13366>.
- 441 [15] Zhao D, Badur MG, Luebeck J, Magaña JH, Birmingham A, Sasik R, et al. Combinatorial  
442 CRISPR-Cas9 Metabolic Screens Reveal Critical Redox Control Points Dependent on the  
443 KEAP1-NRF2 Regulatory Axis. *Mol Cell* 2018;69:699-708.e7.  
444 <https://doi.org/10.1016/j.molcel.2018.01.017>.
- 445 [16] Zhang DD, Hannink M. Distinct Cysteine Residues in Keap1 Are Required for Keap1-  
446 Dependent Ubiquitination of Nrf2 and for Stabilization of Nrf2 by Chemopreventive  
447 Agents and Oxidative Stress. *Mol Cell Biol* 2003;23:8137–51.  
448 <https://doi.org/10.1128/MCB.23.22.8137-8151.2003>.
- 449 [17] Ortiz SR, Field MS. Mammalian metabolism of erythritol: a predictive biomarker of  
450 metabolic dysfunction. *Curr Opin Clin Nutr Metab Care* 2020;23:296–301.  
451 <https://doi.org/10.1097/MCO.0000000000000665>.
- 452 [18] Weng Y, Fan X, Bai Y, Wang S, Huang H, Yang H, et al. SLC2A5 promotes lung  
453 adenocarcinoma cell growth and metastasis by enhancing fructose utilization. *Cell Death*  
454 *Discov* 2018;4:38. <https://doi.org/10.1038/s41420-018-0038-5>.
- 455 [19] Chen W-L, Jin X, Wang M, Liu D, Luo Q, Tian H, et al. GLUT5-mediated fructose  
456 utilization drives lung cancer growth by stimulating fatty acid synthesis and  
457 AMPK/mTORC1 signaling. *JCI Insight* 2020;5:e131596.  
458 <https://doi.org/10.1172/jci.insight.131596>.
- 459 [20] Rzechonek DA, Dobrowolski A, Rymowicz W, Mirończuk AM. Recent advances in  
460 biological production of erythritol. *Crit Rev Biotechnol* 2018;38:620–33.  
461 <https://doi.org/10.1080/07388551.2017.1380598>.
- 462 [21] Bagnasco SM, Murphy HR, Bedford JJ, Burg MB. Osmoregulation by slow changes in  
463 aldose reductase and rapid changes in sorbitol flux. *Am J Physiol-Cell Physiol*  
464 1988;254:C788–92. <https://doi.org/10.1152/ajpcell.1988.254.6.C788>.
- 465 [22] A Systematic Review of the Effects of Polyols on Gastrointestinal Health and Irritable  
466 Bowel Syndrome. *Adv Nutr* 2017. <https://doi.org/10.3945/an.117.015560>.
- 467 [23] Kim J, Kim J, Bae J-S. ROS homeostasis and metabolism: a critical liaison for cancer  
468 therapy. *Exp Mol Med* 2016;48:e269–e269. <https://doi.org/10.1038/emm.2016.119>.
- 469 [24] Ghanbari Movahed Z, Rastegari-Pouyani M, Mohammadi M hossein, Mansouri K. Cancer  
470 cells change their glucose metabolism to overcome increased ROS: One step from cancer  
471 cell to cancer stem cell? *Biomed Pharmacother* 2019;112:108690.  
472 <https://doi.org/10.1016/j.biopha.2019.108690>.
- 473 [25] Valdés A, Lucio-Cazaña FJ, Castro-Puyana M, García-Pastor C, Fiehn O, Marina ML.  
474 Comprehensive metabolomic study of the response of HK-2 cells to hyperglycemic hypoxic  
475 diabetic-like milieu. *Sci Rep* 2021;11:5058. <https://doi.org/10.1038/s41598-021-84590-2>.
- 476 [26] Aurora AB, Khivansara V, Leach A, Gill JG, Martin-Sandoval M, Yang C, et al. Loss of  
477 glucose 6-phosphate dehydrogenase function increases oxidative stress and glutaminolysis  
478 in metastasizing melanoma cells. *Proc Natl Acad Sci* 2022;119:e2120617119.

- 479 <https://doi.org/10.1073/pnas.2120617119>.
- 480 [27] Valayannopoulos V, Verhoeven NM, Mention K, Salomons GS, Sommelet D, Gonzales M,  
481 et al. Transaldolase deficiency: A new cause of hydrops fetalis and neonatal multi-organ  
482 disease. *J Pediatr* 2006;149:713–7. <https://doi.org/10.1016/j.jpeds.2006.08.016>.
- 483 [28] Verhoeven NM, Huck JHJ, Roos B, Struys EA, Salomons GS, Douwes AC, et al.  
484 Transaldolase Deficiency: Liver Cirrhosis Associated with a New Inborn Error in the  
485 Pentose Phosphate Pathway. *Am J Hum Genet* 2001;68:1086–92.  
486 <https://doi.org/10.1086/320108>.
- 487 [29] Mitsuishi Y, Taguchi K, Kawatani Y, Shibata T, Nukiwa T, Aburatani H, et al. Nrf2  
488 Redirects Glucose and Glutamine into Anabolic Pathways in Metabolic Reprogramming.  
489 *Cancer Cell* 2012;22:66–79. <https://doi.org/10.1016/j.ccr.2012.05.016>.
- 490 [30] Tang Y-C, Hsiao J-R, Jiang S-S, Chang J-Y, Chu P-Y, Liu K-J, et al. c-MYC-directed  
491 NRF2 drives malignant progression of head and neck cancer via glucose-6-phosphate  
492 dehydrogenase and transketolase activation. *Theranostics* 2021;11:5232–47.  
493 <https://doi.org/10.7150/thno.53417>.
- 494 [31] Brownlee M. The Pathobiology of Diabetic Complications: A Unifying Mechanism.  
495 *Diabetes* 2005;54:1615–25. <https://doi.org/10.2337/diabetes.54.6.1615>.
- 496 [32] Furukawa S, Fujita T, Shimabukuro M, Iwaki M, Yamada Y, Nakajima Y, et al. Increased  
497 oxidative stress in obesity and its impact on metabolic syndrome. *J Clin Invest*  
498 2017;114:1752–61. <https://doi.org/10.1172/JCI21625>.
- 499  
500

501 **Figures**  
502

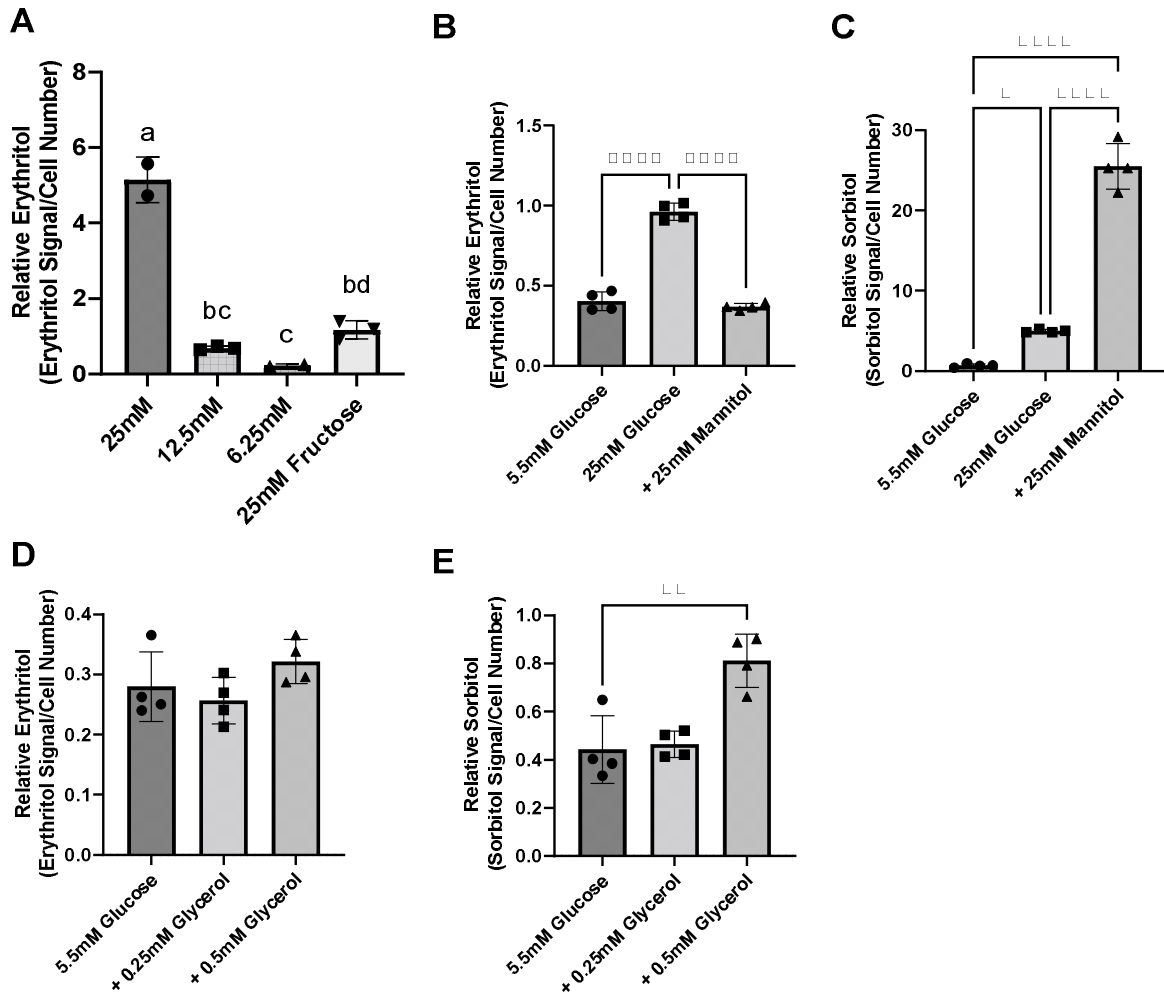

503 **Figure 1. Intracellular erythritol and sorbitol levels respond to carbohydrate**  
504 **concentrations in media and osmotic stress.** (A) Relative erythritol in cells cultured for 48 hrs  
505 in media containing 25mM, 12.5mM, or 6.25 mM glucose or 25mM fructose. Labeled means  
506 without a common letter differ,  $p < 0.05$ . (B) Relative erythritol and (C) relative sorbitol in cells  
507 cultured in media containing 5.5mM or 25mM glucose, or 5.5mM glucose supplemented with  
508 25mM mannitol. (D) Relative erythritol and (E) relative sorbitol in cells cultured in 5.5mM  
509 glucose media or 5.5mM glucose media containing 0.25mM or 0.5mM glycerol. All relative  
510 metabolite values are normalized to internal standard and cell number. Data are shown as mean  $\pm$   
511 SD and were analyzed by one-way ANOVA, followed by Tukey's multiple comparisons test  
512 (n=2-4). \* $p < 0.05$ , \*\* $p < 0.01$ , \*\*\*\* $p < 0.0001$   
513

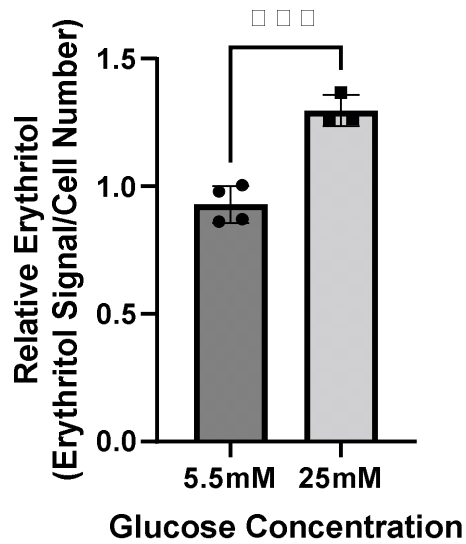

514  
515  
516  
517  
518  
519

**Figure 2. Intracellular erythritol in HK-2 cells is increased in high-glucose media.**

Intracellular erythritol was measured in HK-2 cells exposed to 5.5mM or 25mM glucose media for 48hrs (n=4). Data is normalized by internal standard and cell number, shown as mean ± SD, and analyzed by unpaired t-test. \*\*\*p<0.001.

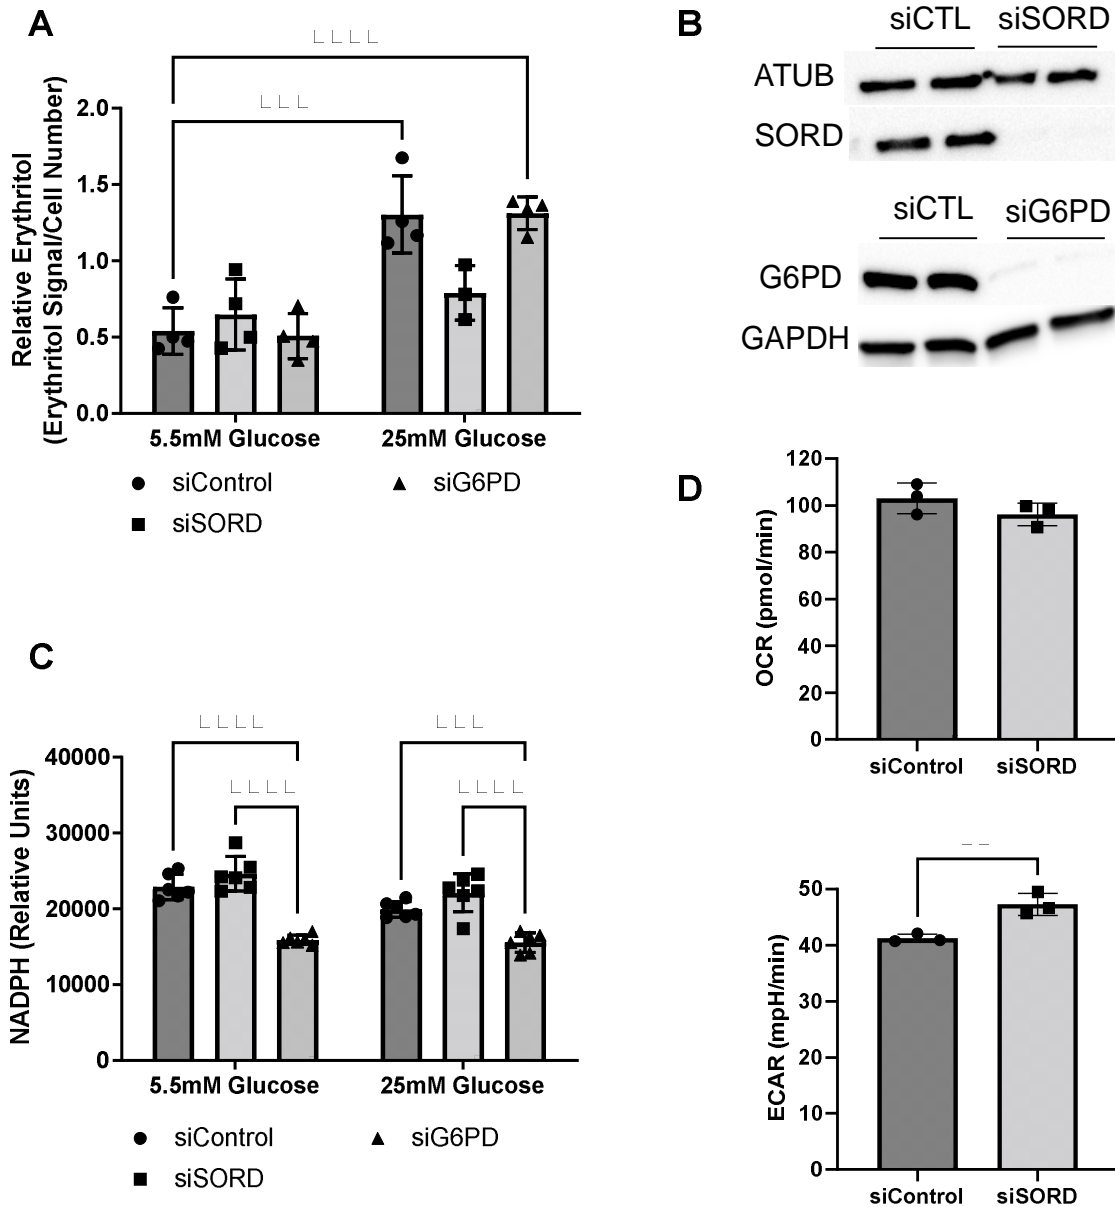

520  
521

522 **Figure 3. SORD and G6PD knockdown affect cellular metabolism.** Knockdown of SORD  
523 and G6PD were performed by reverse transfection. (A) Intracellular erythritol (n=4), (B) protein  
524 levels of SORD and G6PD, and (C) intracellular NADPH were measured after 48hr treatment  
525 with 5.5mM or 25mM glucose (n=6). Erythritol was normalized to internal standard and cell  
526 number. (D) OCR and ECAR were measured in control or SORD knockdown cells following  
527 48hrs in 10mM glucose media and normalized to cell number (n=3). Data is presented as mean  $\pm$   
528 SD, (A) and (C) were analyzed by two-way ANOVA followed by Sidak's multiple comparisons  
529 test, (D) was analyzed with an unpaired t-test. \*\*p<0.01, \*\*\*p<0.001, \*\*\*\*p<0.0001. ATUB,  
530 alpha tubulin; ECAR, extracellular acidification rate; GAPDH, glyceraldehyde 3-phosphate  
531 dehydrogenase; G6PD, glucose 6-phosphate dehydrogenase; SORD, sorbitol dehydrogenase.

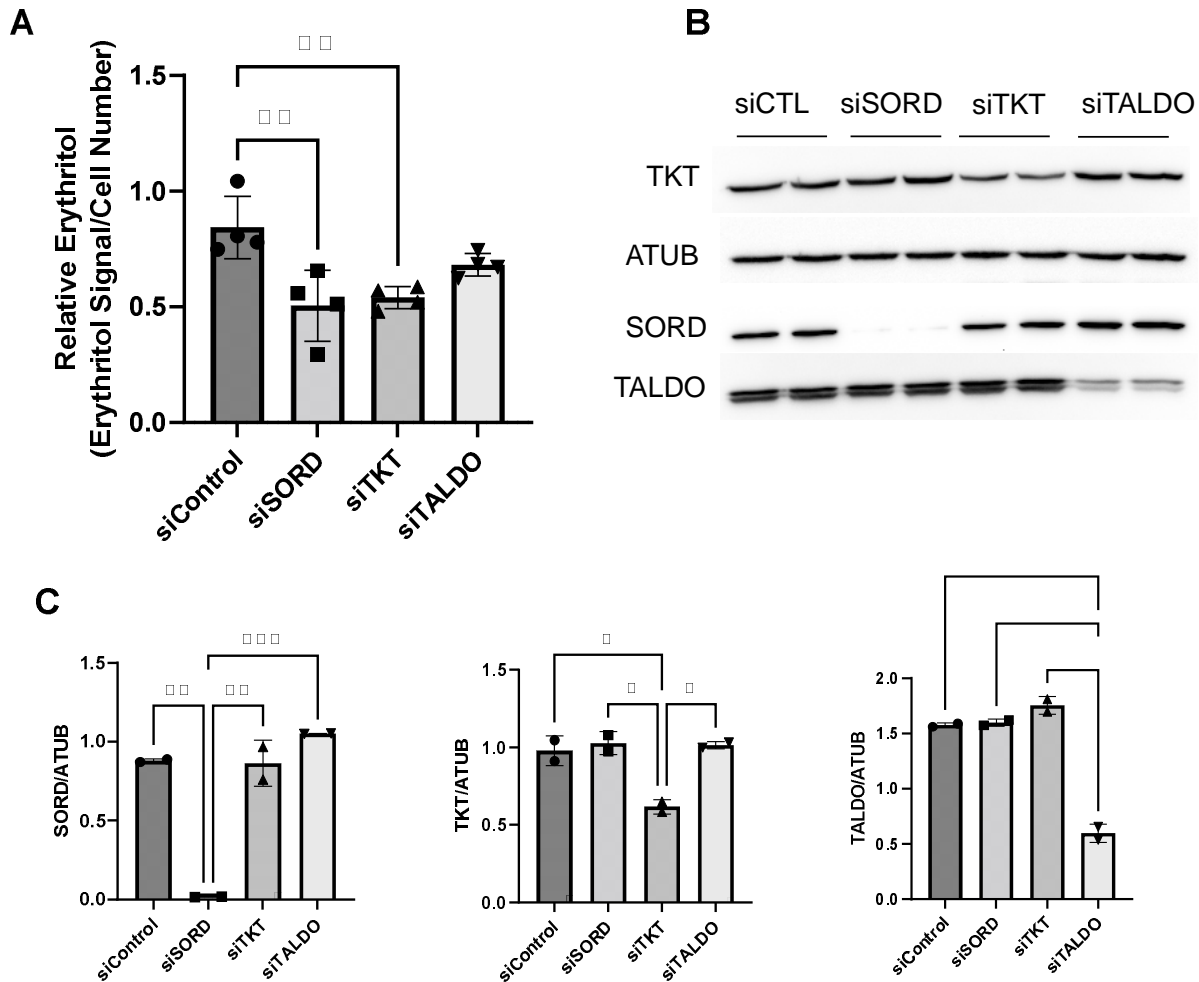

532

533

534

535

536

537

538

539

540

**Figure 4. Knockdown of non-oxidative PPP enzymes SORD and TKT decrease**

**intracellular erythritol levels.** Knockdown of SORD, TKT, and TALDO were performed using reverse transfection. After 48hr treatment with 25mM glucose media, (A) intracellular erythritol (n=4) and (B) protein expression was measured. (C) Protein expression was quantified using Image J (n=2). Relative erythritol is normalized to internal standard and cell number. Data is shown as mean  $\pm$  SD and was analyzed by ordinary one-way ANOVA and Tukey's multiple comparisons test. \* $p < 0.05$ , \*\* $p < 0.01$ , \*\*\* $p < 0.001$ . ATUB, alpha tubulin; CTL, control; SORD, sorbitol dehydrogenase; TALDO, transaldolase; TKT, transketolase.



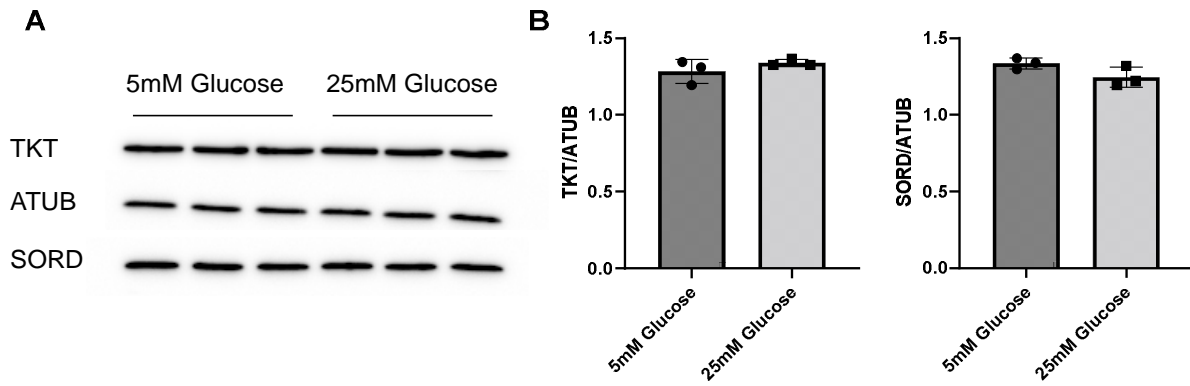

541  
542

543 **Figure 5. SORD and TKT protein expression do not increase in response to high glucose**  
544 **media.** (A) Western blot of TKT and SORD expression after 48hr treatment in 5.5mM or 25mM  
545 glucose media and (B) quantification. Expression was quantified with ImageJ (n=3). ATUB,  
546 alpha tubulin; SORD, sorbitol dehydrogenase; TKT, transketolase.

547

A

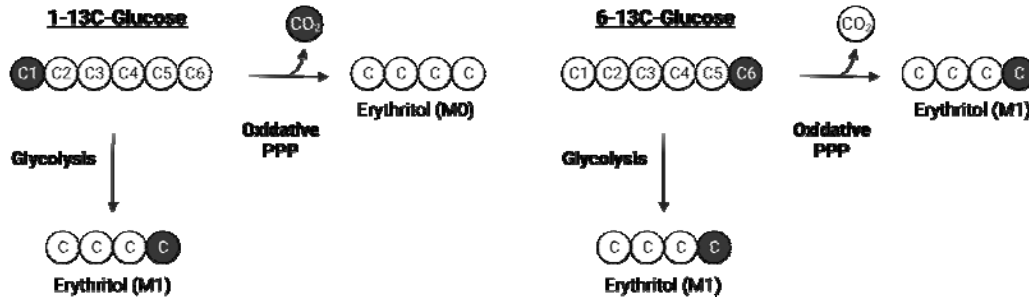

B

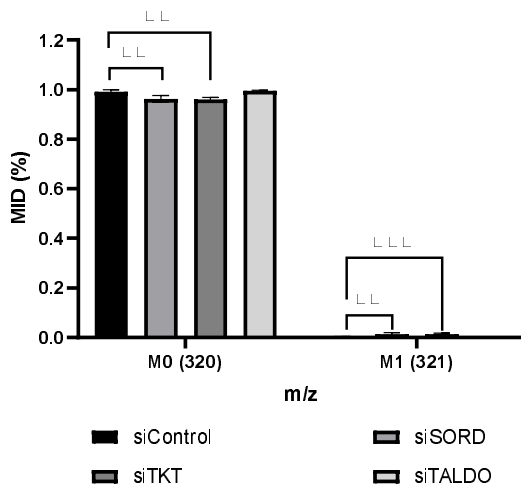

C

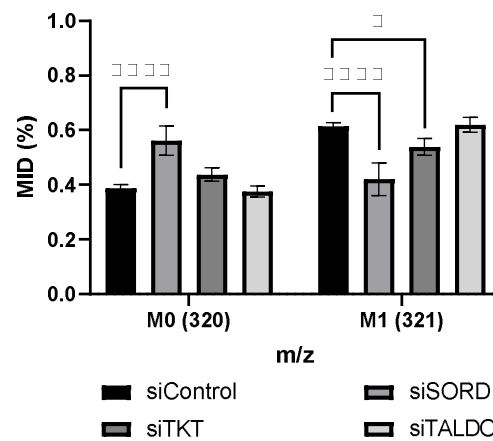

548

549

550

551

552

553

554

555

556

557

**Figure 6. Erythritol carbons are derived from the oxidative PPP, not directly from glycolysis.** (A) Representation of differential incorporation of  $^{13}\text{C}$  into erythritol from 1- $^{13}\text{C}$  or 6- $^{13}\text{C}$ -glucose. (B) MID of unlabeled (M0) and labelled (M1) erythritol after incubation with 25mM 1- $^{13}\text{C}$ -glucose. (C) MID of unlabeled (M0) and labelled (M1) erythritol after incubation with 25mM 6- $^{13}\text{C}$ -glucose. Data is shown as mean  $\pm$  SD,  $n=4-5$ , and was analyzed by two-way ANOVA with Dunnett's multiple comparisons test. \* $p<0.05$ , \*\* $p<0.01$ , \*\*\* $p<0.001$ , \*\*\*\* $p<0.0001$ . ATUB, alpha tubulin; MID, mass isotope distribution; SORD, sorbitol dehydrogenase; TALDO, transaldolase; TKT, transketolase.

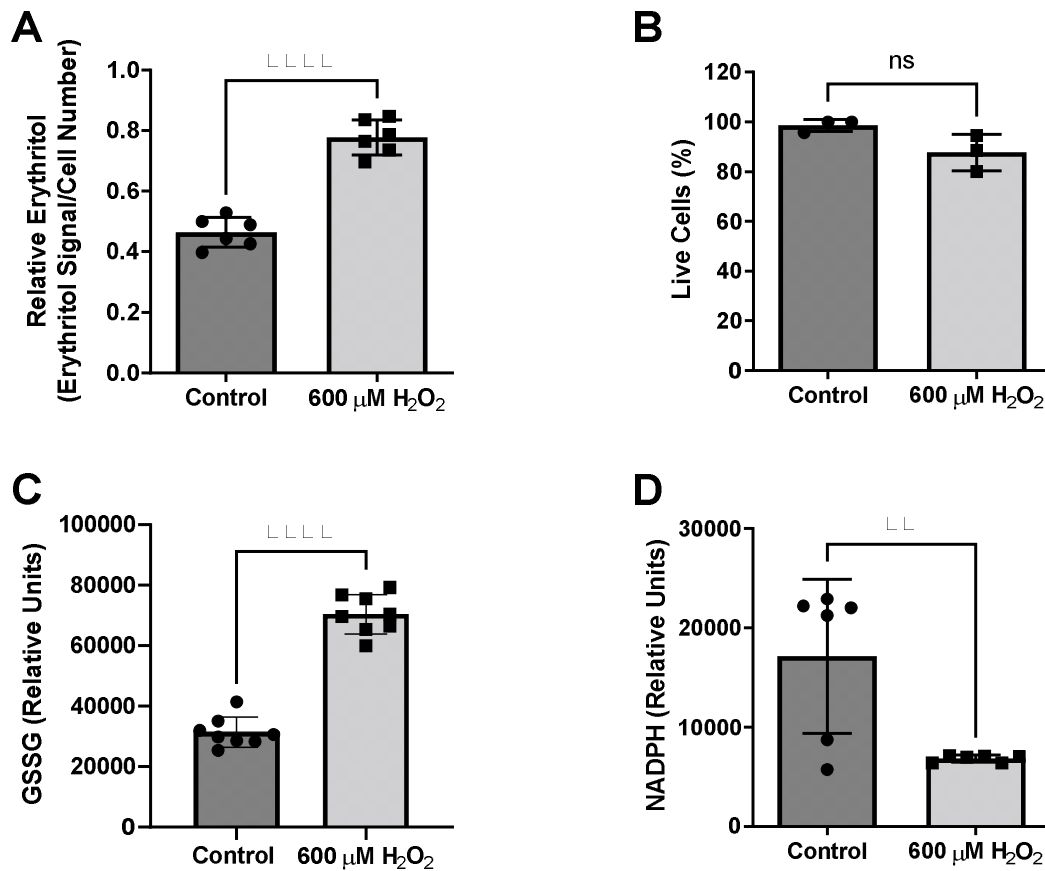

558

559

560

561

562

563

564

**Figure 7. Intracellular erythritol and NADPH respond to hydrogen peroxide in culture medium.** Cells were exposed to 600 $\mu\text{M}$  hydrogen peroxide or vehicle for 8 hr, after which (A) intracellular erythritol, (B) percentage of live cells, (C) oxidized glutathione (GSSG), and (D) NADPH were measured. Erythritol is normalized to internal standard and cell number. Data is presented as mean  $\pm$  SD, n=3-6, analyzed by unpaired t-test. \*\*p<0.01, \*\*\*\*p<0.0001. GSSG, oxidized glutathione;  $\text{H}_2\text{O}_2$ , hydrogen peroxide.

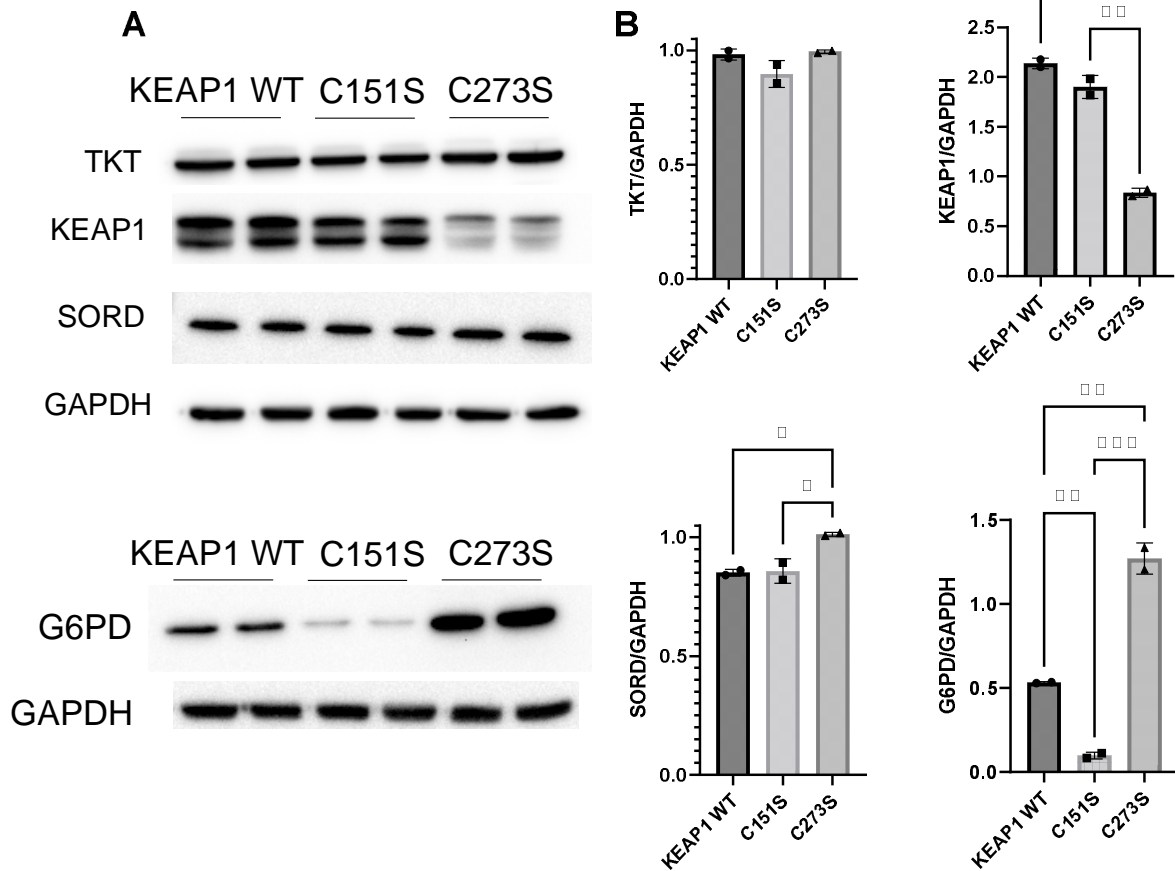

565  
566  
567  
568  
569  
570  
571  
572

**Figure 8. *KEAP1* variants have modified expression of proteins regulated by NRF2.** (A) Western blots of TKT, KEAP1, SORD, and G6PD expression in KEAP1 mutant cells and (B) quantification of protein expression. Expression was quantified with ImageJ (n=3). G6PD, glucose-6-phosphate dehydrogenase; GAPDH, glyceraldehyde-3-phosphate dehydrogenase; KEAP1, Kelch Like ECH Associated Protein 1; SORD, sorbitol dehydrogenase; TKT, transketolase.

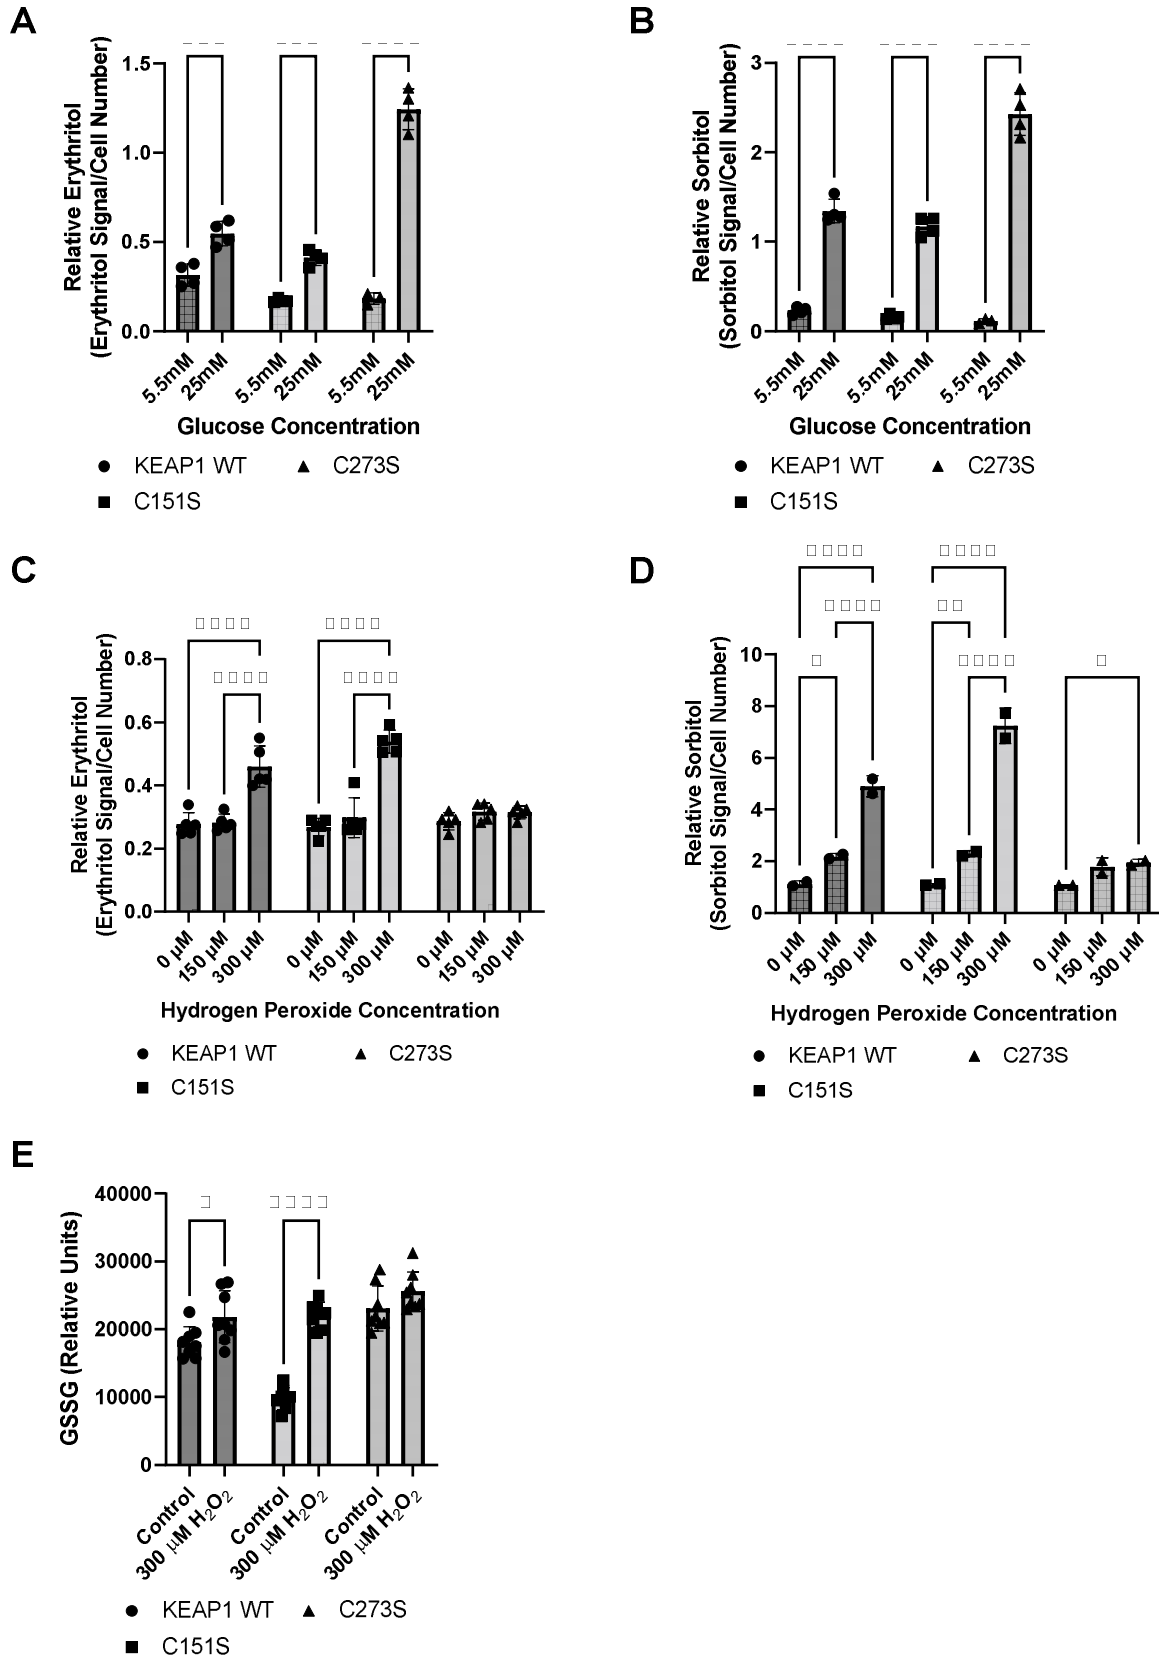

574 **Figure 9. *KEAP1* variants modulate response to high glucose and oxidative stress.**  
575 Intracellular erythritol (A) and sorbitol (B) in *KEAP1* variant cells following 48 hr treatment  
576 with 5.5mM or 25mM glucose (n=4). Erythritol (C) and sorbitol (D) following exposure to 0-  
577 300 $\mu$ M hydrogen peroxide for 5 hrs (n=2-5). (E) Oxidized glutathione following 5 hr treatment  
578 with hydrogen peroxide. Erythritol is normalized to internal standard and cell number. Data is  
579 presented as mean  $\pm$  SD and analyzed by two-way ANOVA followed by Sidak's (A, B, E) and  
580 Tukey's (C, D) multiple comparisons test. \*  $p < 0.05$ , \*\*\*  $p < 0.001$ , \*\*\*\*  $p < 0.0001$ . WT-  
581 *KEAP1* cells stably overexpress *KEAP1*. C273S cells have impaired ability of *KEAP1* to  
582 repress NRF2, resulting in constitutively active NRF2. C151S cells exhibit constitutive  
583 repression of NRF2. GSSG, oxidized glutathione; H<sub>2</sub>O<sub>2</sub>, hydrogen peroxide.
